# Supplementary material for: Reduction in potentially inappropriate end-of-life hospital care for cancer patients during the COVID-19 pandemic: A retrospective population-based study
Source: PubMed Central journal article supplement (PMC10798006; doi:10.1177/02692163231217373), 2023-12-23
Supplement: sj-pdf-1-pmj-10.1177_02692163231217373.pdf [file sj-pdf-1-pmj-10.1177_02692163231217373.pdf]

## Supplemental Material

---

**Supplemental Table 1: Included cancers and their categorization based on the International Classification of Diseases 10th Revision (ICD-10) ..... 2**

**Supplemental Table 2: Adjusted odds ratios of receiving potentially inappropriate care in the COVID-19 periods compared to the corresponding reference periods in 2019 (sensitivity analysis)..... 3**

**Supplemental Table 1: Included cancers and their categorization based on the International Classification of Diseases 10th Revision (ICD-10)**

| <b>Cancer type</b>       | <b>Subgroups</b>                                  | <b>ICD-10 codes</b> |
|--------------------------|---------------------------------------------------|---------------------|
| Breast cancer            | Invasive breast cancer                            | C50                 |
| Gastro-intestinal cancer | Esophageal cancer                                 | C15                 |
|                          | Stomach cancer                                    | C16                 |
|                          | Cancer of the small intestine                     | C17                 |
|                          | Colon cancer                                      | C18                 |
|                          | Cancer of the rectosigmoid junction               | C19                 |
|                          | Rectum cancer                                     | C20                 |
|                          | Cancer of the liver and intrahepatic bile ducts   | C22                 |
|                          | Pancreatic cancer                                 | C25                 |
| Hematological cancer     | Lymphomas                                         | C81-C86             |
|                          | Malignant immunoproliferative diseases            | C88                 |
|                          | Multiple myeloma and malignant plasma cell tumors | C90                 |
|                          | Leukemias                                         | C91-C95             |
|                          | Other and unspecified hematological malignancies  | C96                 |
| Lung cancer              | Cancer of the trachea                             | C33                 |
|                          | Cancer of the bronchus and lung                   | C34                 |
| Urological cancer        | Prostate cancer                                   | C61                 |
|                          | Kidney cancer                                     | C64,C65             |
|                          | Cancer of the ureter                              | C66                 |
|                          | Bladder cancer                                    | C67                 |
| Other                    | Cancer of the brain and central nervous system    | C70-C72             |
|                          | Melanoma of the skin                              | C43                 |
|                          | Cancer of the lip, oral cavity and pharynx        | C00-C14             |
|                          | Cancer of the nasal cavity and middle ear         | C30                 |
|                          | Cancer of the larynx                              | C32                 |
|                          | Cervical cancer                                   | C53                 |
| Ovarian cancer           | C56                                               |                     |

**Supplemental Table 2: Adjusted odds ratios of receiving potentially inappropriate care in the COVID-19 periods compared to the corresponding reference periods in 2019 (sensitivity analysis)**

| Indicator                          | Age group          | Period A (1st peak)           | Period B (recovery period)    | Period C (2nd peak)           | Period D (prolonged 2nd peak) |
|------------------------------------|--------------------|-------------------------------|-------------------------------|-------------------------------|-------------------------------|
| Number of patients                 | Total              | 12037                         | 28617                         | 16440                         | 27135                         |
|                                    | <70                | 4412                          | 10269                         | 5870                          | 10049                         |
|                                    | ≥70                | 7625                          | 18348                         | 10570                         | 17086                         |
| Potentially inappropriate EOL care | Total <sup>a</sup> | 0.76 (0.70-0.83) <sup>c</sup> | 0.90 (0.85-0.95) <sup>c</sup> | 0.79 (0.73-0.85) <sup>c</sup> | 0.81 (0.76-0.85) <sup>c</sup> |
|                                    | <70 <sup>b</sup>   | 0.84 (0.73-0.95) <sup>c</sup> | 0.92 (0.84-1.00)              | 0.84 (0.75-0.94) <sup>c</sup> | 0.84 (0.77-0.92) <sup>c</sup> |
|                                    | ≥70 <sup>b</sup>   | 0.72 (0.65-0.81) <sup>c</sup> | 0.88 (0.82-0.95) <sup>c</sup> | 0.76 (0.69-0.84) <sup>c</sup> | 0.78 (0.73-0.84) <sup>c</sup> |
| <i>Chemotherapy</i>                | Total              | 0.90 (0.76-1.06)              | 1.15 (1.04-1.27) <sup>c</sup> | 1.11 (0.97-1.27)              | 1.13 (1.02-1.25)              |
|                                    | <70                | 0.91 (0.73-1.14)              | 1.20 (1.05-1.38) <sup>c</sup> | 1.00 (0.83-1.21)              | 1.08 (0.94-1.24)              |
|                                    | ≥70                | 0.90 (0.69-1.16)              | 1.08 (0.92-1.26)              | 1.25 (1.02-1.52)              | 1.20 (1.03-1.41)              |
| <i>&gt;1 ER contact</i>            | Total              | 0.92 (0.70-1.20)              | 0.82 (0.69-0.96)              | 0.93 (0.75-1.15)              | 1.01 (0.86-1.19)              |
|                                    | <70                | 1.00 (0.70-1.44)              | 0.93 (0.74-1.16)              | 0.84 (0.63-1.11)              | 1.01 (0.81-1.26)              |
|                                    | ≥70                | 0.84 (0.57-1.24)              | 0.71 (0.56-0.90) <sup>c</sup> | 1.08 (0.79-1.50)              | 1.02 (0.79-1.30)              |
| <i>&gt;1 hospitalization</i>       | Total              | 0.71 (0.61-0.82) <sup>c</sup> | 1.00 (0.92-1.09)              | 0.85 (0.75-0.96) <sup>c</sup> | 0.80 (0.73-0.88) <sup>c</sup> |
|                                    | <70                | 0.79 (0.65-0.97)              | 1.02 (0.90-1.15)              | 0.79 (0.67-0.94) <sup>c</sup> | 0.83 (0.73-0.94) <sup>c</sup> |
|                                    | ≥70                | 0.63 (0.51-0.78) <sup>c</sup> | 0.98 (0.87-1.11)              | 0.93 (0.78-1.10)              | 0.79 (0.69-0.91) <sup>c</sup> |
| <i>ICU admission</i>               | Total              | 0.54 (0.44-0.66) <sup>c</sup> | 0.85 (0.75-0.95) <sup>c</sup> | 0.65 (0.55-0.78) <sup>c</sup> | 0.61 (0.54-0.70) <sup>c</sup> |
|                                    | <70                | 0.44 (0.32-0.61) <sup>c</sup> | 0.94 (0.78-1.13)              | 0.88 (0.68-1.13)              | 0.60 (0.49-0.73) <sup>c</sup> |
|                                    | ≥70                | 0.61 (0.46-0.80) <sup>c</sup> | 0.78 (0.66-0.92) <sup>c</sup> | 0.51 (0.40-0.65) <sup>c</sup> | 0.64 (0.53-0.77) <sup>c</sup> |
| <i>Hospitalization &gt;14 days</i> | Total              | 0.57 (0.48-0.67) <sup>c</sup> | 0.81 (0.74-0.90) <sup>c</sup> | 0.66 (0.58-0.76) <sup>c</sup> | 0.69 (0.62-0.77) <sup>c</sup> |
|                                    | <70                | 0.61 (0.47-0.79) <sup>c</sup> | 0.80 (0.68-0.94) <sup>c</sup> | 0.85 (0.68-1.06)              | 0.68 (0.57-0.80) <sup>c</sup> |
|                                    | ≥70                | 0.54 (0.44-0.67) <sup>c</sup> | 0.83 (0.72-0.94) <sup>c</sup> | 0.57 (0.48-0.68) <sup>c</sup> | 0.71 (0.62-0.82) <sup>c</sup> |
| <i>Hospital death</i>              | Total              | 0.77 (0.69-0.85) <sup>c</sup> | 0.84 (0.79-0.90) <sup>c</sup> | 0.73 (0.67-0.80) <sup>c</sup> | 0.77 (0.72-0.82) <sup>c</sup> |
|                                    | <70                | 0.75 (0.64-0.87) <sup>c</sup> | 0.84 (0.76-0.93) <sup>c</sup> | 0.78 (0.68-0.90) <sup>c</sup> | 0.80 (0.72-0.88) <sup>c</sup> |
|                                    | ≥70                | 0.79 (0.70-0.90) <sup>c</sup> | 0.85 (0.78-0.92) <sup>c</sup> | 0.71 (0.63-0.79) <sup>c</sup> | 0.76 (0.69-0.82) <sup>c</sup> |

Abbreviations: EOL = end of life, ER = emergency room, ICU = intensive care unit

<sup>a</sup>Odds ratios and 95% confidence intervals for the total group were adjusted for age, sex and cancer type.

<sup>b</sup>Odds ratios and 95% confidence intervals for the separate age groups were adjusted for sex and cancer type.

<sup>c</sup>Significant result (P<0.01).
